# Supplementary material for: Stable Isotope-Assisted Plant Metabolomics: Investigation of Phenylalanine-Related Metabolic Response in Wheat Upon Treatment With the Fusarium Virulence Factor Deoxynivalenol
Source: Front Plant Sci. 2019 Oct 30;10:1137. doi: 10.3389/fpls.2019.01137 (PMC6831647; doi:10.3389/fpls.2019.01137)
Supplement: Supplementary file 5 [file Table_3.xlsx]

## Sheet: Supplementary Table 3
Supplementary Table 3. Phenylalanine derived metabolites
ID	Metainformation										Sum formulas		Normalization	Found in (anytime)				Manual inspection of time courses			Time Course Cluster (Figure 5)	MS/MS
	m/z	RT [min]	Cn in total	#C from Phe	Identified	Annotated	Identified/Annotated as	Number of annotations	Group	Subgroup	Number of possible sum formulas	(Possible) sum formulas		C2 DON	C2 Mock	C4 DON	C4 Mock	CM low	CM high	Maximum CM 48 hat		MS/MS Spectra Acquired	Network
Phenylalanine	166.086	4.46	9	9	x		Phenylalanine		Amino acid			C9H11O2N	not normalized	x	x	x			x	x		x
Chlorogenic acid	355.103	9.54	16	9	x		Chlorogenic acid		HCA derivative			C16H18O9	directly normalized	x	x	x	x
Vanillin	153.055	11.63	8	7	x		Vanillin		Benzoic acid derivative			C8H8O3	indirectly normalized		x	x	x					x
Sinapyl alcohol	211.097	12.97	11	9	x		Sinapyl alcohol		HCA derivative			C11H14O4	directly normalized	x	x	x	x
p-coumaric acid	165.055	13.41	9	9	x		p-Coumaric acid		HCA			C9H8O3	indirectly normalized		x		x
Homoorientin	449.108	13.88	21	9	x		Homoorientin		Flavonoid	GlcF		C21H20O11	directly normalized	x	x	x	x	x			4	x	A
Ferulic acid	195.065	14.05	10	9	x		Ferulic acid		HCA			C10H10O4	indirectly normalized	x	x	x	x	x
Sinapaldehyde	209.081	14.46	11	9	x		Sinapaldehyde		HCA derivative			C11H12O4	directly normalized	x	x	x	x	x				x	B
Coniferaldehyde	179.07	14.52	10	9	x		Coniferaldehyde		HCA derivative			C10H10O3	indirectly normalized						x			x	B
Vitexin	433.113	14.63	21	9	x		Vitexin = apigenin 8-C glycoside		Flavonoid	GlcF		C21H20O10	directly normalized	x	x	x	x	x			4	x	A
FerSer	353.15	16.43	20	9	x		Feruloylserotonin		HCAA			C20H20O4N2	directly normalized	x		x					1A	x
FerTam	337.155	20.97	20	9	x		Feruloyltryptamine		HCAA			C20H20O3N2	indirectly normalized	x		x				x	1B	x
Trimethyltricetin	345.097	24.01	18	9	x		3´,4´,5´-O-trimethyltricetin		Flavonoid			C18H16O7	directly normalized	x	x	x	x	x				x
A.1	144.066	3.02	6			x	Pyrogallol isomer 1	1	others	Phenol	2	[M+NH4]+: C6H6O3; [M+H]+: C6H9O3N	not normalized	x	x				x			x
A.2	127.039	3.07	6			x	Pyrogallol isomer 2	1	others	Phenol	1	[M+H]+: C6H6O3	not normalized
A.3	166.087	4.11		9		x	(p-coumaraldehyde; Pyruvophenone) isomer 1	3	HCA derivative		1	[M]: C9H8O2	not normalized	x	x							x
A.4	149.06	4.12		9		x	(p-coumaraldehyde; Pyruvophenone) isomer 2	3	HCA derivative		1	[M]: C9H8O2	not normalized	x
A.5	127.039	4.18	6			x	Pyrogallol isomer 3	1	others	Phenol	1	[M+H]+: C6H6O3	not normalized			x						x
A.6	137.06	4.18	8			x	Benzene acetic acid; 3,4-Dihydroxystyrene; 4-Hydroxyphenylacetaldehyde; m-Toluic acid	4	others		1	[M+H]+: C8H8O2	not normalized			x						x
A.7	251.139	5.06	13			x	(Coumaroylhydroxyputrescine; Caffeoylputrescine) isomer 1	2	HCAA		2	[M+H]+: C13H18O3N2; [M+NH4]+: C13H15O3N	not normalized	x		x					1A	x
A.8	122.097	5.11		8		x	Putative phenylacetic acid derivative (Styrene) isomer 1	1	Putative phenylacetic acid derivative		2	[M+NH4]+: C8H8; [M+H]+: C8H11N	not normalized	x	x			x
A.9	105.07	5.43	8	8		x	Putative phenylacetic acid derivative (Styrene) isomer 2	1	Putative phenylacetic acid derivative		1	[M]: C8H8	not normalized	x	x	x						x
A.10	169.05	5.58	8			x	Vanillic acid; homogentisate; 3,4-Dihydroxyphenylacetate; 3,4-Dihydroxymandelaldehyde	4	others		1	[M+H]+: C8H8O4	not normalized	x	x
A.11	156.066	5.9	7			x	Putative benzoic acid derivative (p-Hydroxybenzoic acid)	1	Putative benzoic acid derivative		2	[M+H]+: C7H9O3N; [M+NH4]+: C7H6O3	not normalized
A.12	208.061	6.15	10			x	Cyano-p-hydroxycinnamic acid	1	HCA derivative		3	[M+H]+: C10H7O3N; [M+H]+: C10H9O4N; [M+NH4]+: C10H6O4	indirectly normalized
A.13	531.171	6.42	23	9		x	ChemSpider ID 9366869; ChemSpider ID 28282287; ChemSpider ID 10179892	3	HCA derivative		2	[M+H]+: C23H30O14; [M+Na]+: C23H24O6N8	indirectly normalized			x				x	2
A.14	251.139	6.45	13	9		x	(Coumaroylhydroxyputrescine; Caffeoylputrescine) isomer 2	2	HCAA		2	[M+H]+: C13H18O3N2; [M+NH4]+: C13H15O3N	indirectly normalized	x	x	x				x
A.15	127.039	6.67	6			x	Pyrogallol isomer 4	1	others	Phenol	1	[M+H]+: C6H6O3	indirectly normalized		x	x
A.16	251.139	6.95	13	9		x	(Coumaroylhydroxyputrescine; Caffeoylputrescine) isomer 3	2	HCAA		1	[M]: C13H18O3N2	indirectly normalized	x		x					1A	x
A.17	335.11	7.29	15			x	p-Hydroxycinnamyl alcohol 4-D-hexoside isomer 1	1	HCA derivative		1	[M+Na]+: C15H20O7	directly normalized			x	x
A.18	153.055	7.3	8			x	4-Hydroxyphenylacetate	1	others		1	[M+H]+: C8H8O3	indirectly normalized	x	x	x	x					x
A.19	235.145	7.48		9		x	Coumaroylputrescine	1	HCAA		3	[M+Na]+: C16H20; [M+H]+: C13H18O2N2; [M+NH4]+: C13H15O2N	indirectly normalized	x	x	x	x					x	D
A.20	365.085	7.52	15			x	Caffeic acid hexoside isomer 1	1	HCA derivative		1	[M+Na]+: C15H18O9	indirectly normalized	x	x	x	x
A.21	293.161	8.25	14			x	p-coumaroylhydroxyagmatine; Caffeoylagmatine	2	HCAA		2	[M+H]+: C14H20O3N4; [M+NH4]+: C14H17O3N3	directly normalized	x	x	x	x					x
A.22	291.146	8.37	14	9		x	p-coumaroyl-dehydrohydroxyagmatine, Caffeoylhistamine	2	HCAA		2	[M+H]+: C14H18O3N4; [M+NH4]+: C14H15O3N3	indirectly normalized						x	x		x
A.23	365.121	8.71	16			x	Coniferin	1	HCA derivative		1	[M+Na]+: C16H22O8	directly normalized	x	x	x	x		x	x	3
A.24	265.155	8.75		9		x	Valylphenylalanine	1	others	Dipeptide	4	[M+Na]+: C17H22O; [M+K]+: C14H26O2; [M+H]+: C14H20O3N2; [M+NH4]+: C14H17O3N	directly normalized	x	x	x				x	1B	x	D
A.25	281.114	8.84		9		x	Phenylalanylaspartic acid or aspartylphenylalanine	1	others	Dipeptide	6	[M+Na]+: C16H18O3; [M+K]+: C13H22O4; [M+H]+: C13H16O5N2; [M+H]+: C14H12ON6; [M+NH4]+: C13H13O5N; [M+NH4]+: C14H9ON5	indirectly normalized	x							1A
A.26	167.07	8.99	9			x	Caffeyl alcohol; melilotic acid; 2-Hydroxy-3-phenylpropanoic acid; Acetovanillone; 3-Methoxy-4-hydroxyphenylacetaldehyde; L-beta-Phenyllactic acid; 4-Hydroxyphenylacetic acidmethylester	7	HCA derivative		1	[M+H]+: C9H10O3	directly normalized	x	x	x	x		x			x
A.27	395.132	9.19	17			x	Syringin isomer 1	1	HCA derivative		1	[M+Na]+: C17H24O9	directly normalized	x	x	x	x	x				x
A.28	211.097	9.19	10			x	p-coumaric acid methyl ether	1	HCA derivative		1	[M+CH3OH+H]+: C10H10O3	directly normalized	x	x	x	x	x
A.29	195.065	9.51	10			x	(5-Hydroxyconiferaldehyde; 3-(2,3-Dihydroxyphenyl)-2-propenoic acid-3-methylether; 3-(4-Hydroxy-3-methoxyphenyl)-2-propenoic acid) isomer 1	3	HCA derivative		1	[M+H]+: C10H10O4	directly normalized	x	x	x	x			x	3
A.30	369.118	9.54	17	9		x	Feruloylquinic acid isomer 1	1	HCA derivative		1	[M]: C17H20O9	indirectly normalized	x		x	x			x	3	x
A.31	165.055	9.6		9		x	phenylpyruvate; trans-2-Hydroxycinnamate; Caffaldehyde	3	HCA derivative		1	[M+H]+: C9H8O3	indirectly normalized	x		x		x			2
A.32	391.101	9.63		9		x	Feruloylquinic acid isomer 2	1	HCA derivative		2	[M]: C17H20O9; [M]: C18H16O5N4	directly normalized	x	x	x	x		x	x	3	x
A.33	395.131	9.66	17			x	Syringin isomer 2	1	HCA derivative		1	[M+Na]+: C17H24O9	indirectly normalized	x	x	x	x
A.34	277.167	9.95		9		x	Coumaroylagmatine	1	HCAA		4	[M+H]+: C14H20O2N4; [M+NH4]+: C14H17O2N3; [M+Na]+: C17H22N2; [M+K]+: C14H26ON2	indirectly normalized	x			x					x
A.35	295.129	10.22	14	9		x	Glutamylphenylalanine	1	others	Dipeptide	2	[M+H]+: C14H18O5N2; [M+NH4]+: C14H15O5N	directly normalized	x	x	x	x			x	3	x
A.36	357.118	10.27	16	9		x	Ferulic acid O-hexoside isomer 1	1	HCA derivative		1	[M]: C16H20O9	indirectly normalized			x			x	x	2
A.37	536.197	10.28	22	9		x	6-O-(trans-feruloyl)-β-D-galactopyranosyl-(1→4)-D-galactopyranose	1	HCA derivative		1	[M]: C22H30O14	indirectly normalized	x	x	x	x	x
A.38	195.065	10.29	10	9		x	(5-Hydroxyconiferaldehyde; 3-(2,3-Dihydroxyphenyl)-2-propenoic acid-3-methylether; 3-(4-Hydroxy-3-methoxyphenyl)-2-propenoic acid) isomer 2	3	HCA derivative		1	[M+H]+: C10H10O4	directly normalized	x	x	x	x			x	3	x	B
A.39	177.055	10.3	10	9		x	8-Methoxycoumarin isomer 1	1	others	Coumarins	1	[M+H]+: C10H8O3	indirectly normalized	x	x	x	x					x
A.40	379.101	10.36		9		x	Ferulic acid O-hexoside isomer 2	1	HCA derivative		3	[M]: C16H20O9; [M]: C17H16O5N4; [M]: C18H12ON8	directly normalized	x	x	x	x				3	x
A.41	335.111	10.43	15			x	p-Hydroxycinnamyl alcohol 4-D-hexoside isomer 2	1	HCA derivative		1	[M+Na]+: C15H20O7	directly normalized	x	x	x	x				1B
A.42	415.124	10.87	18	9		x	PubChem CID 91076016 Isomer 1	1	HCA derivative		1	[M]: C18H22O11	directly normalized	x	x	x	x		x		4	x
A.43	556.239	11.19	26	18		x	Bidenlignaside B	1	Lignan		3	[M+NH4]+: C26H34O12; [M+H]+: C26H37O12N; [M+Na]+: C26H31O4N9	indirectly normalized	x		x	x		x	x		x	B
A.44	521.202	11.2	26	9		x	((-)-Pinoresinol hexoside; Matairesinoside) isomer 1	2	Lignan		2	[M+H]+: C26H32O11; [M+Na]+: C26H26O3N8	directly normalized	x	x	x	x		x	x	3	x
A.45	373.128	11.58	20			x	Flavonoid: eg Quercetin pentamethyl ether isomer 1	30	Flavonoid		1	[M+H]+: C20H20O7	directly normalized	x	x	x	x		x
A.46	409.111	11.61	17	8		x	Putative phenylacetic acid derivative	1	Putative phenylacetic acid derivative		1	[M+Na]+: C17H22O10	directly normalized	x	x	x	x				3
A.47	369.118	11.61	17			x	Feruloylquinic acid isomer 3	1	HCA derivative		2	[M+H]+: C17H20O9; [M+Na]+: C17H14ON8	indirectly normalized	x	x	x	x
A.48	537.197	11.78	26			x	(Phellavin; 5-Hydroxy-6,7,3´,4´,5´-pentamethoxyflavanone 5-O-rhamnoside; 7-O-(4-methoxycinnamoyl) tecomoside) isomer 1	3	Flavonoid, others	GlcF	2	[M+H]+: C26H32O12; [M+Na]+: C26H26O4N8	indirectly normalized
A.49	339.108	11.79	16			x	p-Coumaroylquinic acid	1	HCA derivative		2	[M+H]+: C16H18O8; [M+Na]+: C16H12N8	indirectly normalized	x	x	x	x				3
A.50	573.158	11.99	26			x	Chalconaringenin 2´-rhamnosyl- (1->4) -xyloside; Licuroside; Liquiritigenin 7-apiofuranoside-4´-hexoside	3	Flavonoid, others	GlcF, Chalkon	3	[M+Na]+: C26H30O13; [M+H]+: C26H16O3N14; [M+NH4]+: C26H13O3N13	directly normalized	x	x	x	x	x				x
A.51	531.147	12.04	24			x	6´-O-(p-Coumaroyl)-procumbide isomer 1	1	others	Iridoid	3	[M+Na]+: C24H28O12; [M+H]+: C24H14O2N14; [M+NH4]+: C24H11O2N13	indirectly normalized	x	x	x	x
A.52	343.102	12.22	15			x	Caffeic acid hexoside isomer 2	1	HCA derivative		2	[M+H]+: C15H18O9; [M+Na]+: C15H12ON8	directly normalized	x	x	x	x		x
A.53	415.124	12.26	18	9		x	PubChem CID 91076016 Isomer 2	1	HCA derivative		1	[M]: C18H22O11	directly normalized	x	x	x	x					x
A.54	369.118	12.26	17	9		x	Feruloylquinic acid isomer 4	1	HCA derivative		2	[M+H]+: C17H20O9; [M+Na]+: C17H14ON8	indirectly normalized	x		x	x	x			3
A.55	581.15	12.58	26	9		x	Flavonoid; eg Isoorientin 7-O-xyloside	48	Flavonoid	DiGlcF	2	[M+H]+: C26H28O15; [M+Na]+: C26H22O7N8	directly normalized	x	x	x	x	x			4	x	A
A.56	355.102	12.75	16	7		x	Putative benzoic acid derivative	14	Putative benzoic acid derivative		2	[M+H]+: C16H18O9; [M+Na]+: C16H12ON8	indirectly normalized			x	x		x		4
A.57	185.081	12.76	9	6		x	3,4,5-trimethoxyphenol	1	others	Phenol	1	[M+H]+: C9H12O4	directly normalized	x	x	x	x				3	x
A.58	197.081	12.78	10	7		x	Putative benzoic acid derivative (3,4,5-trimethoxybenzaldehyde)	1	Putative benzoic acid derivative		1	[M+H]+: C10H12O4	directly normalized	x	x	x	x					x
A.59	445.134	12.78	19	9		x	PubChem CID 101615126	1	HCA derivative		1	[M]: C19H24O12	indirectly normalized	x		x	x		x	x
A.60	359.149	12.8	20			x	Lignan, Flavonoid; eg Matairesinol; 6-Prenylnaringenin	10	Flavonoid, Lignan		1	[M+H]+: C20H22O6	directly normalized	x	x	x	x		x	x	3
A.61	586.25	12.88	27	9		x	Citrusin B	1	HCA derivative		3	[M+NH4]+: C27H36O13; [M+H]+: C27H39O13N; [M+Na]+: C27H33O5N9	indirectly normalized			x	x		x		2
A.62	369.118	12.97	17	8		x	Putative phenylacetic acid derivative	8	Putative phenylacetic acid derivative		2	[M+H]+: C17H20O9; [M+Na]+: C17H14ON8	indirectly normalized			x	x		x		2	x	C
A.63	404.155	12.98	17	8		x	Putative phenylacetic acid derivative	1	Putative phenylacetic acid derivative		1	[M]: C17H22O10	indirectly normalized									x
A.64	409.111	12.98	17	8		x	Putative phenylacetic acid derivative	1	Putative phenylacetic acid derivative		1	[M]: C17H22O10	indirectly normalized	x	x	x	x					x
A.65	540.244	13.15	26	18		x	CHEBI ID 139470 isomer 1	1	Lignan		3	[M+NH4]+: C26H34O11; [M+H]+: C26H37O11N; [M+Na]+: C26H31O3N9	indirectly normalized			x					2
A.66	239.091	13.16	12	9		x	3,4,5-trimethoxycinnamic acid; cinametic acid	2	HCA derivative		1	[M+H]+: C12H14O5	directly normalized	x	x	x	x		x	x	3
A.67	411.129	13.18	19	9		x	ChemSpider ID 22913939	1	HCA derivative		2	[M+H]+: C19H22O10; [M+Na]+: C19H16O2N8	indirectly normalized			x	x		x	x		x
A.68	559.178	13.27	26			x	(Phellavin; 5-Hydroxy-6,7,3´,4´,5´-pentamethoxyflavanone 5-O-rhamnoside; 7-O-(4-methoxycinnamoyl) tecomoside) isomer 2	3	Flavonoid, others	GlcF	3	[M+Na]+: C26H32O12; [M+H]+: C26H18O2N14; [M+NH4]+: C26H15O2N13	indirectly normalized	x		x	x					x
A.69	565.156	13.44	26	9		x	Flavonoid; eg Isovitexin-7-O-xyloside isomer 1	57	Flavonoid	DiGlcF	2	[M+H]+: C26H28O14; [M+Na]+: C26H22O6N8	directly normalized	x	x	x	x				4	x	A
A.70	625.177	13.46	28			x	Flavonoid; eg Isoscoparin 7-O-hexoside isomer 1	60	Flavonoid	DiGlcF	2	[M+H]+: C28H32O16; [M+Na]+: C28H26O8N8	directly normalized	x	x	x	x				4	x	A
A.71	359.149	13.64	20	9		x	Flavonoid, Lignan or Phenylpropanoid; (eg Brosimacutin B; mataisoresinol; Dehydrodiconiferyl alcohol) isomer 1	15	Flavonoid, Lignan, HCA derivative		1	[M+H]+: C20H22O6	indirectly normalized	x						x
A.72	551.212	13.8	27			x	Medioresinol 4´-O-beta-D-glucopyranoside	1	Lignan		2	[M+H]+: C27H34O12; [M+Na]+: C27H28O4N8	indirectly normalized			x
A.73	434.202	13.89	19	8		x	Putative phenylacetic acid derivative	1	Putative phenylacetic acid derivative		3	[M+NH4]+: C19H28O10; [M+H]+: C19H31O10N; [M+Na]+: C19H25O2N9	directly normalized	x	x	x	x					x	C
A.74	538.228	13.97	26	18		x	((-)-Pinoresinol hexoside; Matairesinoside) isomer 2	2	Lignan		3	[M+NH4]+: C26H32O11; [M+H]+: C26H35O11N; [M+Na]+: C26H29O3N9	indirectly normalized	x		x	x					x	B
A.75	341.139	13.98	20	9		x	Flavonoid; eg (+−)-5-deoxykievitone isomer 1	30	Flavonoid		1	[M+H]+: C20H20O5	directly normalized	x	x	x	x		x	x	3
A.76	374.145	14	16	7		x	Putative benzoic acid derivative	10	Putative benzoic acid derivative		3	[M+NH4]+: C16H20O9; [M+H]+: C16H23O9N; [M+Na]+: C16H17ON9	indirectly normalized			x	x					x	C
A.77	251.092	14.17	13	9		x	ferulic acid methyl ester monoacetate	1	HCA derivative		1	[M+H]+: C13H14O5	directly normalized	x	x	x	x					x	C
A.78	438.239	14.22	25	18		x	Dicoumaroylspermidine	1	HCAA	DiHCAA	3	[M+H]+: C25H31O4N3; [M+NH4]+: C25H28O4N2; [M+K]+: C25H37O3N	indirectly normalized			x	x					x
A.79	540.244	14.25	26	18		x	CHEBI ID 139470 isomer 2	1	Lignan		3	[M+NH4]+: C26H34O11; [M+H]+: C26H37O11N; [M+Na]+: C26H31O3N9	indirectly normalized	x	x	x	x	x				x	B
A.80	600.265	14.55	28	9		x	(+)-lyoniresinol-3-α-O-β-D-glucopyranoside	1	Lignan		3	[M+NH4]+: C28H38O13; [M+H]+: C28H41O13N; [M+Na]+: C28H35O5N9	indirectly normalized			x					2
A.81	479.119	14.6	22			x	Flavonoid; eg Quercetin 3-O-methyl-7-O-galactoside	52	Flavonoid	GlcF	2	[M+H]+: C22H22O12; [M+Na]+: C22H16O4N8	directly normalized		x	x	x				4	x	A
A.82	584.234	14.65	27	9		x	others; eg Alboside II	19	others	Iridoid	3	[M+NH4]+: C27H34O13; [M+H]+: C27H37O13N; [M+Na]+: C27H31O5N9	indirectly normalized			x	x				4
A.83	557.163	14.88	26			x	Dalpanin; Amurensin; 5,7-Dihydroxy-6-C-methylflavanone 7-xylosyl- (1->3) -xyloside; 3,4-Dihydroxychalcone 4-beta-L-arabinopyranosyl- (1->4) -galactoside; 3,5,7,3´,4´-Pentahydroxy-6-prenylflavanone 7-hexoside; Phellatin	6	Flavonoid	GlcF	3	[M+Na]+: C26H30O12; [M+H]+: C26H16O2N14; [M+NH4]+: C26H13O2N13	directly normalized	x	x	x	x		x
A.84	565.156	14.9	26			x	Flavonoid; eg Isovitexin-7-O-xyloside isomer 2	57	Flavonoid	diGlcF	2	[M+H]+: C26H28O14; [M+Na]+: C26H22O6N8	directly normalized	x	x	x	x	x			4
A.85	579.171	14.99	27			x	Flavonoid; eg Apigenin 7-O-rutinoside	58	Flavonoid	diGlcF	2	[M+H]+: C27H30O14; [M+Na]+: C27H24O6N8	directly normalized	x	x	x	x	x			4
A.86	341.138	15.2	20			x	Flavonoid; eg (+−)-5-Deoxykievitone isomer 2	30	Flavonoid		1	[M+H]+: C20H20O5	directly normalized	x	x	x	x		x
A.87	603.205	15.28	28			x	(+)-Syringaresinol-O-beta-D-hexoside	1	Lignan		3	[M+Na]+: C28H36O13; [M+H]+: C28H22O3N14; [M+NH4]+: C28H19O3N13	directly normalized	x	x	x	x		x	x	3
A.88	393.116	15.31	17			x	sinapaldehyde hexoside	1	HCA derivative		1	[M+Na]+: C17H22O9	indirectly normalized	x	x	x	x	x
A.89	433.113	15.33	21			x	Flavonoid; eg Kaempferol-3-isorhamnoside	68	Flavonoid	GlcF	2	[M+H]+: C21H20O10; [M+Na]+: C21H14O2N8	indirectly normalized			x	x	x
A.90	463.124	15.58	22			x	Flavonoid; eg Chrysoeriol O-hexoside	69	Flavonoid	GlcF	2	[M+H]+: C22H22O11; [M+Na]+: C22H16O3N8	indirectly normalized		x		x	x				x	A
A.91	531.147	15.67	24			x	6´-O-(p-Coumaroyl)-procumbide isomer 2	1	others	Iridoid	3	[M+Na]+: C24H28O12; [M+H]+: C24H14O2N14; [M+NH4]+: C24H11O2N13	directly normalized	x	x	x	x	x
A.92	609.182	15.69	28			x	Flavonoid; eg Kaempferol-4´-methyl ether 3-neohesperioside	52	Flavonoid	DiGlcF	2	[M+H]+: C28H32O15; [M+Na]+: C28H26O7N8	directly normalized	x	x	x	x	x			4	x	A
A.93	640.224	15.8	29	9		x	Flavonoid; eg Pectolinarigenin 7-rutinoside	10	Flavonoid	DiGlcF	3	[M+NH4]+: C29H34O15; [M+H]+: C29H37O15N; [M+Na]+: C29H31O7N9	directly normalized	x	x	x	x	x				x	C
A.94	393.116	16.24	17	8		x	Putative phenylacetic acid derivative	2	Putative phenylacetic acid derivative		1	[M]: C17H22O9	directly normalized	x	x	x	x	x				x
A.95	388.161	16.26	17	8		x	Putative phenylacetic acid derivative	2	Putative phenylacetic acid derivative		1	[M]: C17H22O9	indirectly normalized			x	x	x			4	x	C
A.96	335.113	16.27	17	8		x	Putative phenylacetic acid derivative	1	Putative phenylacetic acid derivative		1	[M+H]+: C17H18O7	indirectly normalized			x	x	x			2
A.97	493.134	16.47	23			x	Flavonoid; eg Malvidin 3-O-hexoside isomer 1	51	Flavonoid	GlcF	3	[M+H]+: C23H24O12; [M+Na]+: C23H18O4N8; [M+]+: C23H25O12	directly normalized	x	x	x	x					x
A.98	639.192	16.48	29			x	Flavonoid; eg Tricin 7-rutinoside	17	Flavonoid	DiGlcF	2	[M+H]+: C29H34O16; [M+Na]+: C29H28O8N8	directly normalized	x	x	x	x					x
A.99	399.141	16.5	20			x	trans-Grandmarin isovalerate	1	others	Coumarins	1	[M+Na]+: C20H24O7	directly normalized	x	x	x	x	x			3
A.100	371.149	16.65	21			x	Flavonoid; eg 5′-Prenylhomoeriodictyol isomer 1	21	Flavonoid		1	[M+H]+: C21H22O6	indirectly normalized	x					x	x
A.101	601.189	16.79	28			x	Podorhizol beta-D-hexoside	1	Lignan		4	[M+H]+: C28H30O12N3; [M+Na]+: C28H34O13; [M+Na]+: C28N11H24O4; [M+NH4]+: C28N2H27O12	directly normalized	x	x	x	x	x
A.102	137.06	16.81	8	7		x	Putative benzoic acid derivative (m-Toluic acid)	1	Putative benzoic acid derivative		1	[M+H]+: C8H8O2	directly normalized	x	x	x	x		x	x	3
A.103	359.149	16.85	20	9		x	Flavonoid, Lignan or Phenylpropanoid; (eg Brosimacutin B; mataisoresinol; Dehydrodiconiferyl alcohol) isomer 2	15	Flavonoid, Lignan, HCA derivative		1	[M+H]+: C20H22O6	indirectly normalized	x	x	x	x		x
A.104	565.192	17.01	27	9		x	Isoliquiritigenin 2´-glucosyl- (1->4) -rhamnoside; Pinocembrin 7-O-neohesperidoside; Naringenin 5,7-dimethyl ether 4´-O-xylosyl-(1->4)-arabinoside	3	Flavonoid	DiGlcF	2	[M+H]+: C27H32O13; [M+Na]+: C27H26O5N8	indirectly normalized			x	x		x	x	2
A.105	313.128	17.23	15			x	p-Hydroxycinnamyl alcohol 4-D-hexoside isomer 3	1	HCA derivative		1	[M+H]+: C15H20O7	indirectly normalized				x
A.106	373.128	17.44	20	9		x	Flavonoid: eg Quercetin pentamethyl ether isomer 2	30	Flavonoid		1	[M]: C20H20O7	indirectly normalized	x	x	x	x
A.107	419.17	17.59	22	9		x	syringaresinol	1	Lignan		1	[M]: C22H26O8	indirectly normalized						x	x
A.108	395.11	17.59	20	9		x	Flavonoid: eg Quercetin pentamethyl ether isomer 3	30	Flavonoid		1	[M+Na]+: C20H20O7	indirectly normalized	x	x	x	x		x
A.109	704.24	17.61	30	9		x	PubChem ID 58982066	1	HCA derivative		6	[M+H]+: C30H41O18N; [M+H]+: C30H31O9N12; [M+Na]+: C30H35O10N9; [M+Na]+: C30H25ON20; [M+NH4]+: C30H38O18; [M+NH4]+: C30H28O9N11	indirectly normalized
A.110	647.158	17.81	28			x	Flavonoid; eg Isoscoparin 7-O-hexoside isomer 2	60	Flavonoid	DiGlcF	3	[M+Na]+: C28H32O16; [M+H]+: C28H18O6N14; [M+NH4]+: C28H15O6N13	directly normalized	x	x	x	x		x		4
A.111	371.149	17.93	21			x	Flavonoid; eg 5′-Prenylhomoeriodictyol isomer 2	21	Flavonoid		1	[M+H]+: C21H22O6	directly normalized	x	x	x	x		x	x	3
A.112	549.212	17.96	31	18		x	ChemSpider ID 24632404	1	Lignan		2	[M+H]+: C31H32O9; [M+Na]+: C31H26ON8	indirectly normalized			x			x
A.113	125.06	18	7			x	Guaiacol	1	others		1	[M+H]+: C7H8O2	directly normalized	x	x	x	x		x
A.114	163.075	18.19	10			x	Methyl cinnamic acid	1	HCA derivative		1	[M+H]+: C10H10O2	indirectly normalized									x
A.115	381.181	18.3	22			x	Di-coumaroylputrescine	1	HCAA	DiHCAA	3	[M+K]+: C22H30O3; [M+H]+: C22H24O4N2; [M+NH4]+: C22H21O4N	indirectly normalized	x							1A
A.116	411.192	18.49	23	18		x	Feruloyl-coumaroylputrescine; Caffeoyl-coumaroylcadaverine	2	HCAA	DiHCAA	3	[M+K]+: C23H32O4; [M+H]+: C23H26O5N2; [M+NH4]+: C23H23O5N	directly normalized	x		x		x			1A	x	D
A.117	493.134	18.65	23			x	Flavonoid; eg Malvidin 3-O-hexoside isomer 2	51	Flavonoid	GlcF	3	[M+H]+: C23H24O12; [M+Na]+: C23H18O4N8; [M+]+: C23H25O12	directly normalized	x	x	x	x				4	x
A.118	441.202	18.66	24	18		x	Di-feruloylputrescine; Coumaroyl-sinapoylputrescine; Feruloyl-coumaroylhydroxycadaverine; Feruloyl-caffeoylcadaverine	4	HCAA	DiHCAA	3	[M+K]+: C24H34O5; [M+H]+: C24H28O6N2; [M+NH4]+: C24H25O6N	indirectly normalized	x		x			x	x	1A
A.119	371.149	19	21			x	Flavonoid; eg 5′-Prenylhomoeriodictyol isomer 3	21	Flavonoid		1	[M+H]+: C21H22O6	indirectly normalized	x	x	x	x		x		2
A.120	507.15	19.45	24			x	Flavonoid; eg Tricetin trimethyl ether 7-O-hexoside	17	Flavonoid	GlcF	2	[M+H]+: C24H26O12; [M+Na]+: C24H20O4N8	directly normalized	x	x	x	x	x			4	x
A.121	773.192	19.63	36			x	Flavonoid; eg Isoorientin 4′-O-hexoside-2′′-O-(E)-caffeate	17	Flavonoid	GlcF	4	[M+H]+: C36H36O19; [M+H]+: C36H16ON22; [M+NH4]+: C36H13ON21; [M+Na]+: C36H30O11N8	directly normalized	x	x	x	x
A.122	838.277	19.76	38	9		x	ChemSpider ID 8852233; ChemSpider ID 8947043	2	HCA derivative		5	[M+NH4]+: C38H44O20; [M+H]+: C38H27O2N23; [M+H]+: C38H47O20N; [M+NH4]+: C38H24O2N22; [M+Na]+: C38H41O12N9	indirectly normalized			x				x	3	x
A.123	515.155	19.78	26	Several: 9,18		x	ChemSpider ID 204894; ChemSpider ID 4976380	2	Lignan, HCA derivative		2	[M+H]+: C26H26O11; [M+Na]+: C26H20O3N8	directly normalized	x	x	x	x			x	1B	x
A.124	341.138	20.25	20			x	Flavonoid; eg (+−)-5-Deoxykievitone isomer 3	30	Flavonoid		1	[M+H]+: C20H20O5	indirectly normalized				x
A.125	417.154	20.35	22			x	1-Acetoxypinoresinol; Aliarin; 3,7-Dihydroxy-2- [ 4-hydroxy-3- (4-hydroxy-3-methylbutyl) phenyl ] -5,6-dimethoxy-4H-1-benzopyran-4-one	3	Lignan, Flavonoid		2	[M+H]+: C22H24O8; [M+Na]+: C22H18N8	directly normalized	x	x	x	x		x
A.126	557.165	20.5	28			x	Epicatechin 5-O-beta-D-glucopyranoside-3-benzoate	1	Flavonoid	GlcF	2	[M+H]+: C28H28O12; [M+Na]+: C28H22O4N8	directly normalized	x	x	x	x			x
A.127	331.081	20.69	17			x	Flavonoid; eg 3,7-Di-O-methylquercetin	74	Flavonoid		1	[M+H]+: C17H14O7	directly normalized	x	x	x	x		x			x
A.128	405.118	20.88	20			x	Flavonoid; eg 5,4´-Dihydroxy-3,6,7,8,2´-pentamethoxyflavone	25	Flavonoid		2	[M+H]+: C20H20O9; [M+Na]+: C20H14ON8	directly normalized	x	x	x	x					x
A.129	419.097	20.88	20			x	Flavonoid; eg Kaempferol-3-xyloside	17	Flavonoid	GlcF	2	[M+H]+: C20H18O10; [M+Na]+: C20H12O2N8	directly normalized	x	x	x	x
A.130	675.207	20.99	36			x	Nallaflavanone	1	Flavonoid	DiF	2	[M+H]+: C36H34O13; [M+Na]+: C36H28O5N8	directly normalized	x	x	x	x		x
A.131	177.055	21.16	10	9		x	8-Methoxycoumarin isomer 2	1	others	Coumarins	1	[M+H]+: C10H8O3	directly normalized	x	x	x	x		x			x
A.132	415.139	21.22	22	18		x	Flavonoid, Lignan; eg Kanzonol S; beta-peltatin	10	Flavonoid, Lignan		2	[M+H]+: C22H22O8; [M+Na]+: C22H16N8	indirectly normalized	x	x	x	x		x			x
A.133	527.155	21.45	27	9		x	Viscutin 1 isomer 1	2	Flavonoid, HCA derivative	GlcF	2	[M+H]+: C27H26O11; [M+Na]+: C27H20O3N8	directly normalized	x	x	x	x					x
A.134	557.165	21.51	28	18		x	ChemSpider ID 34497391	1	HCA derivative		2	[M+H]+: C28H28O12; [M+Na]+: C28H22O4N8	directly normalized	x	x	x	x		x	x	1B
A.135	885.242	21.51	40	Several: 9,18		x	ChemSpider ID 8828551	1	HCA derivative		2	[M]: C40H46O21; [M]: C40H26O3N22	indirectly normalized	x	x	x	x		x	x
A.136	331.081	21.68	17	9		x	Flavonoid; eg Tricin	74	Flavonoid		1	[M+H]+: C17H14O7	directly normalized	x	x	x	x	x				x
A.137	527.155	22.01	27	9		x	Viscutin 1 isomer 2	2	Flavonoid, HCA derivative	GlcF	2	[M+H]+: C27H26O11; [M+Na]+: C27H20O3N8	directly normalized	x	x	x	x					x
A.138	495.128	24.08	26			x	Salvianolic acid	1	HCA derivative		2	[M+H]+: C26H22O10; [M+Na]+: C26H16O2N8	directly normalized	x	x	x	x		x		4
A.139	317.173	25.54	17			x	Gingerol isomer 1	1	HCA derivative		1	[M+Na]+: C17H26O4	directly normalized	x	x	x	x		x
A.140	301.107	27.16	17			x	Flavonoid; Naringenin 7,4′-dimethyl ether	43	Flavonoid		1	[M+H]+: C17H16O5	directly normalized	x		x
A.141	317.173	27.78	17			x	Gingerol isomer 2	1	HCA derivative		1	[M+Na]+: C17H26O4	directly normalized	x	x	x	x
U.1	103.054	4.11		8							1	[M]: C8H6	not normalized									x
U.2	163.075	8.71	10	9							1	[M+H]+: C10H10O2	directly normalized	x	x	x				x	1B
U.3	768.243	9.6		9							79	[M+NH4]+: C27H42O24; [M+NH4]+: C45H34O11; [M+H]+: C18H37O19N15; [M+H]+: C22H25O8N25; [M+H]+: C23H21O4N29; [M+H]+: C24H37O18N11; [M+H]+: C25H33O14N15; [M+H]+: C26H29O10N19; [M+H]+: C27H25O6N23; [M+H]+: C27H45O24N; [M+H]+: C28H21O2N27; [M+H]+: C28H41O20N5; [M+H]+: C29H37O16N9; [M+H]+: C30H33O12N13; [M+H]+: C31H29O8N17; [M+H]+: C33H41O18N3; [M+H]+: C38H25O3N17; [M+H]+: C40H37O13N3; [M+H]+: C41H33O9N…	indirectly normalized	x	x	x	x	x
U.4	163.075	12.31	10	9							1	[M+H]+: C10H10O2	directly normalized	x	x	x	x		x	x	1B
U.5	450.161	12.78	18	6							1	[M]: C18H24O12	indirectly normalized			x	x					x
U.6	395.095	12.79		7							3	[M]: C16H20O10; [M]: C14H8N14; [M]: C17H16O6N4	directly normalized	x	x	x	x					x
U.7	193.086	12.96	11	8							1	[M+H]+: C11H12O3	directly normalized	x	x	x	x				3	x
U.8	451.122	13.19		9							6	[M]: C19H24O11; [M]: C16H16O5N10; [M]: C17H12ON14; [M]: C20H20O7N4; [M]: C21H16O3N8; [M]: C32H16N2	directly normalized	x	x	x	x			x	3	x
U.9	584.129	13.44		8							34	[M+NH4]+: C42H14O3; [M+H]+: C14H21O15N11; [M+H]+: C15H17O11N15; [M+H]+: C23H9O2N19; [M+H]+: C25H21O12N5; [M+H]+: C26H17O8N9; [M+H]+: C27H13O4N13; [M+H]+: C28H9N17; [M+H]+: C30H21O10N3; [M+H]+: C31H17O6N7; [M+H]+: C42H17O3N; [M+NH4]+: C14H18O15N10; [M+NH4]+: C15H14O11N14; [M+NH4]+: C26H14O8N8; [M+NH4]+: C27H10O4N12; [M+NH4]+: C28H6N16; [M+NH4]+: C30H18O10N2; [M+NH4]+: C31H14O6N6; [M+Na]+: C13H19O1…	directly normalized	x	x	x	x	x			4
U.10	550.214	14.13		8							28	[M+NH4]+: C23H32O14; [M+H]+: C20H27O8N11; [M+H]+: C21H23O4N15; [M+H]+: C22H19N19; [M+H]+: C23H35O14N; [M+H]+: C24H31O10N5; [M+H]+: C25H27O6N9; [M+H]+: C36H27O3N3; [M+H]+: C41H27ON; [M+NH4]+: C20H24O8N10; [M+NH4]+: C21H20O4N14; [M+NH4]+: C22H16N18; [M+NH4]+: C24H28O10N4; [M+NH4]+: C25H24O6N8; [M+NH4]+: C36H24O3N2; [M+Na]+: C20H21N19; [M+Na]+: C22H33O10N5; [M+Na]+: C23H29O6N9; [M+Na]+: C24H25O2N13;…	indirectly normalized					x
U.11	427.186	16.92	28	9							0		indirectly normalized	x		x			x	x	1A
U.12	579.134	18.66	26	18							2	[M+H]+: C26H26O15; [M+Na]+: C26H20O7N8	directly normalized	x	x	x	x					x
U.13	147.044	21.22		9							1	[M+H]+: C9H6O2	directly normalized	x	x	x	x		x			x
U.14	265.134	21.23		7							2	[M+H]+: C17H16ON2; [M+NH4]+: C17H13ON	indirectly normalized									x
U.15	331.082	21.72		18							2	[M+H]+: C18H10O3N4; [M+NH4]+: C18H7O3N3	directly normalized	x	x	x	x	x				x
U.16	798.98	31.92		6							24	[M+H]+: C39H10O20; [M+Na]+: C37H12O20; [M+K]+: C34H16O21; [M+H]+: C23H10O25N8; [M+H]+: C30H6O20N8; [M+H]+: C34H10O22N2; [M+H]+: C35H6O18N6; [M+NH4]+: C23H7O25N7; [M+NH4]+: C34H7O22N; [M+Na]+: C18H4O19N18; [M+Na]+: C21H12O25N8; [M+Na]+: C22H8O21N12; [M+Na]+: C23H4O17N16; [M+Na]+: C25H16O27N2; [M+Na]+: C32H12O22N2; [M+Na]+: C33H8O18N6; [M+Na]+: C38H8O16N4; [M+K]+: C19H12O22N12; [M+K]+: C20H8O18N16;…	not normalized		x	x	x
U.17	541.329	33.09		8							29	[M+H]+: C18H52O17; [M+H]+: C36H44O4; [M+Na]+: C34H46O4; [M+K]+: C31H50O5; [M+H]+: C16H40O7N14; [M+H]+: C17H36O3N18; [M+H]+: C19H48O13N4; [M+H]+: C20H44O9N8; [M+H]+: C21H40O5N12; [M+H]+: C31H44O6N2; [M+H]+: C32H40O2N6; [M+NH4]+: C16H37O7N13; [M+NH4]+: C17H33O3N17; [M+NH4]+: C19H45O13N3; [M+NH4]+: C20H41O9N7; [M+NH4]+: C21H37O5N11; [M+NH4]+: C31H41O6N; [M+NH4]+: C32H37O2N5; [M+Na]+: C15H38O3N18; [M…	not normalized	x	x	x	x
U.18	335.167	34.17		16							0		directly normalized	x	x	x	x		x
																		34	49	37
