# Supplementary material for: Stable Isotope-Assisted Plant Metabolomics: Investigation of Phenylalanine-Related Metabolic Response in Wheat Upon Treatment With the Fusarium Virulence Factor Deoxynivalenol
Source: Front Plant Sci. 2019 Oct 30;10:1137. doi: 10.3389/fpls.2019.01137 (PMC6831647; doi:10.3389/fpls.2019.01137)
Supplement: Supplementary file 6 [file Table_4.xlsx]

## Sheet: Sheet1
Supplementary Table 4. Metabolic composition of clusters discussed in time course clustering
ID	Putatively Annotated	Number of Annotations	Substance Class	m/z	RT [min]	Fold-change DON/Mock 96 hat		Reference
	or Identified as					C2	C4
Cluster 1A
FerSer	Feruloylserotonin *		HCAA	353.15	16.43	104.5	38.1	(Gunnaiah et al., 2012; Gunnaiah and Kushalappa, 2014)
A.7	(Coumaroylhydroxyputrescine; Caffeoylputrescine) isomer 1	2	HCAA	251.139	5.06	6.2	3.5	(Gunnaiah and Kushalappa, 2014; Dhokane et al., 2016; Kage et al., 2018)
A.16	(Coumaroylhydroxyputrescine; Caffeoylputrescine) isomer 2	2	HCAA	251.139	6.95	334.9	10.2	(Gunnaiah and Kushalappa, 2014; Dhokane et al., 2016; Kage et al., 2018)
A.25	Phenylalanylaspartic acid or aspartylphenylalanine	1	others (Dipeptide)	281.114	8.84	15.1	2.5
A.115	Di-coumaroylputrescine	1	HCAA	381.181	18.3	7	0.9
A.116	Feruloyl-coumaroylputrescine; Caffeoyl-coumaroylcadaverine	2	HCAA	411.192	18.49	862.9	27.2	(Moreau et al., 2001; Atanasova-Penichon et al., 2012)
A.118	Di-feruloylputrescine; Coumaroyl-sinapoylputrescine; Feruloyl-coumaroylhydroxycadaverine; Feruloyl-caffeoylcadaverine	4	HCAA	441.202	18.66	96	22.2	(Miller et al., 1996; Moreau et al., 2001; Atanasova-Penichon et al., 2012)
U.11				427.187	16.92	176.6	36.2
Cluster 1B
FerTam	Feruloyltryptamine *		HCAA	337.155	20.97	43.1	36.5
A.24	Valylphenylalanine	1	others (Dipeptide)	265.155	8.75	592	323.2
A.41	p-Hydroxycinnamyl alcohol 4-D-glucoside isomer 2	1	HCA derivative	335.111	10.43	10.5	3.2	(Gunnaiah and Kushalappa, 2014; Gauthier et al., 2015)
A.123	ChemSpider ID 204894; ChemSpider ID 4976380	2	Lignan, HCA derivative	515.155	19.78	10.4	5.5
A.134	ChemSpider ID 34497391	1	HCA derivative	557.165	21.51	5.2	3
U.2				163.075	8.71	104.7	120.5
U.4				163.075	12.31	11.8	8.7
Cluster 2
A.13	ChemSpider ID 9366869; ChemSpider ID 28282287; ChemSpider ID 10179892	3	Lignan, HCA derivative	531.171	6.42	4.8	48.3
A.31	phenylpyruvate; trans-2-Hydroxycinnamate; Caffeoyl aldehyde	3	HCA derivative	165.055	9.6	4.3	19.4	(Gauthier et al., 2015)
A.36	Ferulic acid O-glucoside isomer 1	1	HCA derivative	357.118	10.27	1.9	14.1
A.61	Citrusin B	1	HCA derivative	586.25	12.88	0.9	5.9	(Gunnaiah and Kushalappa, 2014)
A.62	Putative phenylacetic acid derivative	8	Putative phenylacetic acid derivative	369.118	12.97	1.3	3.7
A.65	CHEBI ID 139470 isomer 1	1	Lignan	540.244	13.15	0.8	5.8
A.80	(+)-lyoniresinol-3-α-O-β-D-glucopyranoside	1	Lignan	600.265	14.55	1.3	4.2	(Lee et al., 2005)
A.96	Putative phenylacetic acid derivative	1	Putative phenylacetic acid derivative	335.113	16.27	1	1.8
A.104	Isoliquiritigenin 2´-glucosyl- (1->4) -rhamnoside; Pinocembrin 7-O-neohesperidoside; Naringenin 5,7-dimethyl ether 4´-O-xylosyl-(1->4)-arabinoside	3	Flavonoid	565.192	17.01	1.6	8.9	(Bollina et al., 2011; Gauthier et al., 2015)
A.119	Flavonoid; eg 5′-Prenylhomoeriodictyol isomer 3	21	Flavonoid	371.149	19	1	4.3	(Gunnaiah and Kushalappa, 2014; Gauthier et al., 2015)
Cluster 3
A.23	Coniferin	1	HCA derivative	365.121	8.71	16	17.2	(Bollina et al., 2011; Kumaraswamy et al., 2012; Gunnaiah and Kushalappa, 2014)
A.29	(5-Hydroxyconiferaldehyde; 3-(2,3-Dihydroxyphenyl)-2-propenoic acid-3-methylether; 3-(4-Hydroxy-3-methoxyphenyl)-2-propenoic acid) isomer 1	3	HCA derivative	195.065	9.51	5.4	9.5
A.30	Feruloylquinic acid isomer 1	1	HCA derivative	369.118	9.54	132.6	215.8	(Bollina et al., 2011; Gauthier et al., 2015)
A.32	Feruloylquinic acid isomer 2	1	HCA derivative	391.101	9.63	39.3	32.1	(Bollina et al., 2011; Gauthier et al., 2015)
A.35	Glutamylphenylalanine	1	others (Dipeptide)	295.129	10.22	14.5	6.1
A.38	(5-Hydroxyconiferaldehyde; 3-(2,3-Dihydroxyphenyl)-2-propenoic acid-3-methylether; 3-(4-Hydroxy-3-methoxyphenyl)-2-propenoic acid) isomer 2	3	HCA derivative	195.065	10.29	4.3	2.7
A.40	Ferulic acid O-glucoside isomer 2	1	HCA derivative	379.101	10.36	7.6	4.4
A.44	((-)-Pinoresinol glucoside; Matairesinoside) isomer 1	2	Lignan	521.202	11.2	7.9	6.5
A.46	Putative phenylacetic acid derivative	1	Putative phenylacetic acid derivative	409.111	11.61	1.6	1.6
A.49	p-Coumaroylquinic acid	1	HCA derivative	339.108	11.79	2.9	23.4	(Gunnaiah et al., 2012; Gauthier et al., 2015)
A.54	Feruloylquinic acid isomer 4	1	HCA derivative	369.118	12.26	18.1	43.7	(Bollina et al., 2011; Gauthier et al., 2015)
A.57	3,4,5-trimethoxyphenol	1	others (Phenol)	185.081	12.76	1.3	1.3
A.60	Lignan, Flavonoid; eg Matairesinol; 6-Prenylnaringenin	10	Flavonoid, Lignan	359.149	12.8	4.9	5.3	(Bollina et al., 2011; Gauthier et al., 2015)
A.66	3,4,5-trimethoxycinnamic acid; cinametic acid	2	HCA derivative	239.091	13.16	4.8	3.5
A.75	Flavonoid; eg (+-)-5-deoxykievitone	30	Flavonoid	341.139	13.98	9.7	9.5	(Bollina et al., 2011; Gauthier et al., 2015)
A.87	(+)-Syringaresinol-O-beta-D-glucoside	1	Lignan	603.205	15.28	2.3	1.8	(Bollina et al., 2011; Gauthier et al., 2015)
A.99	trans-Grandmarin isovalerate	1	others (Coumarin)	399.141	16.5	4.7	3.9	(Bollina et al., 2011; Gauthier et al., 2015)
A.102	Putative benzoic acid derivative (m-Toluic acid)	1	Putative benzoic acid derivative	137.06	16.81	4.4	4.9	(Sun and Sun, 2001)
A.111	Flavonoid; eg 5′-Prenylhomoeriodictyol isomer 2	21	Flavonoid	371.149	17.93	10.8	6.3	(Gunnaiah and Kushalappa, 2014; Gauthier et al., 2015)
A.122	ChemSpider ID 8852233; ChemSpider ID 8947043	2	HCA derivative	838.277	19.76	3.2	4.1
U.7				193.086	12.96	2.1	1.8
U.8				451.122	13.19	3.2	3.5
Cluster 4
Homoorientin	Homoorientin *		Flavonoid	449.108	13.88	0.4	2.2	(Reid et al., 1992; Etzerodt et al., 2016)
Vitexin	Vitexin *		Flavonoid	433.113	14.63	0.9	1.2	(Kumaraswamy et al., 2012; Gauthier et al., 2015)
A.42	PubChem CID 91076016 Isomer 1	1	HCA derivative	415.124	10.87	1.3	1.5
A.55	Flavonoid; eg Isoorientin 7-O-xyloside	48	Flavonoid	581.15	12.58	0.6	2.1
A.56	Putative benzoic acid derivative	14	Putative benzoic acid derivative	355.103	12.75	1.1	0.9
A.69	Flavonoid; eg Isovitexin-7-O-xyloside isomer 1	57	Flavonoid	565.156	13.44	1	1.3	(Chamarthi et al., 2014; Gauthier et al., 2015)
A.70	Flavonoid; eg Isoscoparin 7-O-glucoside isomer 1	60	Flavonoid	625.177	13.46	0	1.9	(Bollina et al., 2011; Gauthier et al., 2015)
A.81	Flavonoid; eg Quercetin 3-O-methyl-7-O-galactoside	52	Flavonoid	479.119	14.6	0.1	1.5	(Bollina et al., 2011; Gauthier et al., 2015)
A.82	others; eg Alboside II	19	others (Iridoid)	584.234	14.65	1.5	1.5
A.84	Flavonoid; eg Isovitexin-7-O-xyloside isomer 2	57	Flavonoid	565.156	14.9	1.1	1.3	(Chamarthi et al., 2014; Gauthier et al., 2015)
A.85	Flavonoid; eg Apigenin 7-O-rutinoside	58	Flavonoid	579.171	14.99	1	1.3	(Gunnaiah and Kushalappa, 2014; Gauthier et al., 2015)
A.92	Flavonoid; eg Kaempferol-4´-methyl ether 3-neohesperioside	52	Flavonoid	609.182	15.69	0.4	2.1	(Kumaraswamy et al., 2011; Gauthier et al., 2015)
A.95	Putative phenylacetic acid derivative	2	Putative phenylacetic acid derivative	388.161	16.26	0.7	1
A.110	Flavonoid; eg Isoscoparin 7-O-glucoside isomer 2	60	Flavonoid	647.158	17.81	1.3	1.3	(Bollina et al., 2011; Gauthier et al., 2015)
A.117	Flavonoid; eg Malvidin 3-O-hexoside isomer 2	52	Flavonoid	493.134	18.65	1.3	1.5	(Gunnaiah and Kushalappa, 2014; Gauthier et al., 2015)
A.120	Flavonoid; eg Tricetin trimethyl ether 7-O-hexoside	17	Flavonoid	507.15	19.45	0.8	1.2	(Wojakowska et al., 2013)
A.138	Salvianolic acid	1	HCA derivative	495.128	24.08	1.1	1.5	(Kumaraswamy et al., 2011; Gauthier et al., 2015)
U.9				584.129	13.44	0.8	1
*: identified based on comparison with an authentic reference standard
Atanasova-Penichon, V., Pons, S., Pinson-Gadais, L., Picot, A., Marchegay, G., Bonnin-Verdal, M.-N., et al. (2012). Chlorogenic Acid and Maize Ear Rot Resistance: A Dynamic Study Investigating Fusarium graminearum Development, Deoxynivalenol Production, and Phenolic Acid Accumulation. Molecular Plant-Microbe Interactions 25(12), 1605-1616. doi: 10.1094/MPMI-06-12-0153-R.
Bollina, V., Kushalappa, A., Choo, T., Dion, Y., and Rioux, S. (2011). Identification of metabolites related to mechanisms of resistance in barley against Fusarium graminearum based on mass spectrometry. Plant Molecular Biology 77(4), 355-370. doi: 10.1007/s11103-011-9815-8.
Chamarthi, S.K., Kumar, K., Gunnaiah, R., Kushalappa, A.C., Dion, Y., and Choo, T.M. (2014). Identification of fusarium head blight resistance related metabolites specific to doubled-haploid lines in barley. European Journal of Plant Pathology 138(1), 67-78. doi: 10.1007/s10658-013-0302-8.
Dhokane, D., Karre, S., Kushalappa, A.C., and McCartney, C. (2016). Integrated Metabolo-Transcriptomics Reveals Fusarium Head Blight Candidate Resistance Genes in Wheat QTL-Fhb2. PLOS ONE 11(5), e0155851. doi: 10.1371/journal.pone.0155851.
Etzerodt, T., Gislum, R., Laursen, B.B., Heinrichson, K., Gregersen, P.L., Jørgensen, L.N., et al. (2016). Correlation of Deoxynivalenol Accumulation in Fusarium-Infected Winter and Spring Wheat Cultivars with Secondary Metabolites at Different Growth Stages. Journal of Agricultural and Food Chemistry 64(22), 4545-4555. doi: 10.1021/acs.jafc.6b01162.
Gauthier, L., Atanasova-Penichon, V., Chéreau, S., and Richard-Forget, F. (2015). Metabolomics to decipher the chemical defense of cereals against Fusarium graminearum and deoxynivalenol accumulation. International Journal of Molecular Sciences 16(10), 24839-24872. doi: 10.3390/ijms161024839.
Gunnaiah, R., Kushalappa, A., Duggavathi, R., Fox, S., and Somers, D. (2012). Integrated Metabolo-Proteomic Approach to Decipher the Mechanisms by Which Wheat QTL (Fhb1) Contributes to Resistance against Fusarium graminearum. PLoS ONE 7(7), e40695. doi:10.1371/journal.pone.0040695.
Gunnaiah, R., and Kushalappa, A.C. (2014). Metabolomics deciphers the host resistance mechanisms in wheat cultivar Sumai-3, against trichothecene producing and non-producing isolates of Fusarium graminearum. Plant Physiology and Biochemistry 83(0), 40-50. doi: doi: 10.1016/j.plaphy.2014.07.002.
Kage, U., Hukkeri, S., and Kushalappa, A.C. (2018). Liquid chromatography and high resolution mass spectrometry-based metabolomics to identify quantitative resistance-related metabolites and genes in wheat QTL-2DL against Fusarium head blight. European Journal of Plant Pathology 151(1), 125-139. doi: 10.1007/s10658-017-1362-y.
Kumaraswamy, G.K., Kushalappa, A.C., Choo, T.M., Dion, Y., and Rioux, S. (2012). Differential metabolic response of barley genotypes, varying in resistance, to trichothecene-producing and -nonproducing (tri5−) isolates of Fusarium graminearum. Plant Pathology 61(3), 509-521. doi: 10.1111/j.1365-3059.2011.02528.x.
Kumaraswamy, K., Kushalappa, A., Choo, T., Dion, Y., and Rioux, S. (2011). Mass Spectrometry Based Metabolomics to Identify Potential Biomarkers for Resistance in Barley against Fusarium Head Blight (&lt;i&gt;Fusarium graminearum&lt;/i&gt;). Journal of Chemical Ecology 37(8), 846-856. doi: 10.1007/s10886-011-9989-1.
Lee, D.G., Jung, H.J., and Woo, E.-R. (2005). Antimicrobial property of (+)-lyoniresinol-3alpha-O-beta-D-glucopyranoside isolated from the root bark of Lycium chinense Miller against human pathogenic microorganisms. Archives of pharmacal research 28(9), 1031-1036. doi: 10.1007/bf02977397.
Miller, J.D., Fielder, D.A., Dowd, P.F., Norton, R.A., and Collins, F.W. (1996). Isolation of 4-acetyl-benzoxazolin-2-one (4-ABOA) and diferuloylputrescine from an extract of gibberella ear rot-resistant corn that blocks mycotoxin biosynthesis, and the insect toxicity of 4-ABOA and related compounds. Biochemical Systematics and Ecology 24(7), 647-658. doi: 10.1016/S0305-1978(96)00050-6.
Moreau, R.A., Nuñez, A., and Singh, V. (2001). Diferuloylputrescine and p-coumaroyl-feruloylputrescine, abundant polyamine conjugates in lipid extracts of maize kernels. Lipids 36(8), 839-844. doi: 10.1007/s11745-001-0793-6.
Reid, L.M., Mather, D.E., Arnason, J.T., Hamilton, R.I., and Bolton, A.T. (1992). Changes in phenolic constituents of maize silk infected with Fusarium graminearum. Canadian Journal of Botany 70(8), 1697-1702. doi: 10.1139/b92-209.
Sun, R.C., and Sun, X.F. (2001). Identification and quantitation of lipophilic extractives from wheat straw. Industrial Crops and Products 14(1), 51-64. doi: 10.1016/S0926-6690(00)00088-1.
Wojakowska, A., Perkowski, J., Góral, T., and Stobiecki, M. (2013). Structural characterization of flavonoid glycosides from leaves of wheat (Triticum aestivum L.) using LC/MS/MS profiling of the target compounds. Journal of Mass Spectrometry 48(3), 329-339. doi: 10.1002/jms.3160.
